# Supplementary material
Source: bioRxiv or medRxiv preprint supplement (https://www.biorxiv.org/highwire/filestream/115769/field_highwire_adjunct_files/7/381525-8.pdf)
Supplement: Supplementary file [file 381525-8.pdf]

## SUPPLEMENTAL TABLE 4: XBP1s and ATF6 protein vs ALLC interactions

| Gene     | Log2 FC                         | Log2 FC                            |
|----------|---------------------------------|------------------------------------|
|          | XBP1s/ATF6<br>Protein<br>Levels | XBP1s/ATF6<br>ALLC<br>Interactions |
| STT3A    | 0.620034387                     | 0.440610951                        |
| RPN1     | 0.319326049                     | -0.247843515                       |
| LMAN1    | 0.325615929                     | -0.110646762                       |
| DNAJC10  | 0.632402934                     | -0.139350345                       |
| MANF     | 1.140363944                     | 0.170256146                        |
| ERP44    | 0.376694931                     | 0.176676112                        |
| CALR     | 1.185021336                     | -0.068928204                       |
| P4HB     | 1.057559659                     | 0.194640834                        |
| HSPA5    | 1.941708982                     | 0.926114187                        |
| PDIA4    | 1.853001187                     | 0.787647665                        |
| DNAJB11  | 0.713967695                     | 0.46410119                         |
| HYOU1    | 1.495249753                     | 0.662004664                        |
| PDIA6    | 1.112211638                     | 0.068972019                        |
| CCT6A    | -0.14232254                     | 0.003485811                        |
| MOGS     | 0.161503136                     | -0.415094923                       |
| ERLIN2   | -0.28151227                     | -0.257147309                       |
| UGGT1    | 0.33150015                      | -0.3584124                         |
| DNAJC3   | 0.724778409                     | 0.019388726                        |
| LGALS3BP | 0.089106572                     | -0.218676421                       |
| GOLM1    | -0.10507457                     |                                    |
| CPD      | -0.01088751                     | -0.331231793                       |
| TUBA1A   | -0.05962178                     | 0.481696969                        |
| PRDX4    | 0.062560546                     | -0.270437211                       |
| SRP72    | 0.231421286                     |                                    |
| RCN2     | -0.07664285                     | -0.024111001                       |
| SRP9     | -0.08292647                     |                                    |
| CKAP4    | 0.511986384                     | -0.299279447                       |
| HSP90B1  | 1.780941952                     | 0.42847591                         |
| SERPINH1 | -0.23076364                     | -0.268207782                       |
| HSPA1L   | -0.02955825                     | 0.40686481                         |
| GLG1     | -0.28471493                     | -0.531325164                       |
| AHCY     | -0.14990997                     | -0.294498089                       |
| GANAB    | 0.021761117                     | -0.59331563                        |
| THUMPD1  | -0.0632569                      |                                    |
| ERP29    | -0.0015435                      | -0.826350853                       |
| DDOST    | 0.293922904                     | -0.0283981                         |
| DYNC1H1  | -0.05318459                     |                                    |
| PDIA3    | 0.776494224                     | -0.039504691                       |
| PDCD5    | -0.20970914                     | 0.104996552                        |
| P4HA1    | -0.07598817                     | -0.476561992                       |
| RPN2     | 0.443318345                     | -0.279243891                       |
| CNPY2    | -0.03254536                     | -0.098395725                       |
| FKBP10   | -0.12546739                     | -0.894933969                       |
| CALU     | 0.313279095                     | 0.051087802                        |
| TFRC     | -0.09360586                     | 0.054842232                        |
| PIIB     | 0.831410155                     | -0.277034751                       |
| TMX1     | -0.21482208                     | -0.120575837                       |
| ERLIN1   | -0.11389226                     | -0.915116299                       |
| MAN2A1   | 0.314962847                     | -0.576281217                       |
| SRSF1    | -0.00995924                     | 0.048309123                        |
| TLN1     | -0.02355893                     | -0.336932695                       |
| TXNDC5   | 0.4751785                       | 0.090104053                        |
| RCN1     | 0.171173115                     | -0.068749022                       |
| PRKCSH   | -0.03888896                     | -0.229512672                       |
| HSPA2    | -0.15189171                     | 0.000739237                        |
| NCLN     | 0.05890807                      | -0.52339767                        |
| CANX     | 0.61776736                      | -0.250074975                       |
| PLOD3    | 0.039352661                     | -0.620587784                       |
| ACLY     | -0.00675998                     | 0.217111382                        |
| RPL34    | -0.00471725                     | 0.256896225                        |
| PLOD1    | -0.10621999                     |                                    |
